# Supplementary material
Source: PubMed Central journal article supplement (PMC9081248)
Supplement: NIHMS1795137-supplement-Supplement.pdf [file NIHMS1795137-supplement-Supplement.pdf]

Figure S1. Lot-to-lot variability of E-Gel EX affects circular RNA migration and resolution, related to Table 2.

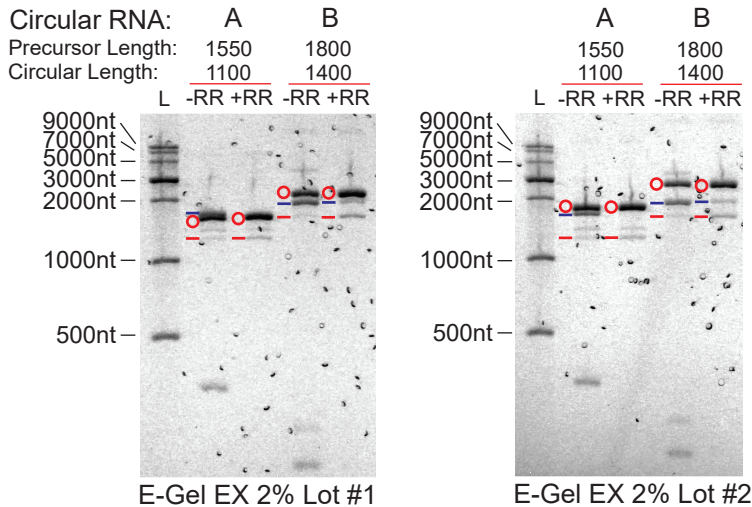

Circular RNA can be resolved from precursor and nicked species across a range of sizes (indicated as precursor RNA length/circular RNA length). In both lots, circular RNA migrates more slowly than nicked linear RNA of equal molecular weight, while linear species migrate faithfully to the ladder (L). Circular RNA migrates more slowly in Lot 2 than in Lot 1. Differences in circular RNA migration can result in band overlap or inversion for small circular RNAs; The 1100nt circRNA runs below its precursor RNA in Lot 1 and above its precursor RNA in lot 2, as confirmed by RNase R digestion. The 1400nt circRNA previously used in Wesselhoeft et al. is distinguishable from its precursor in both lots. Species indicated by icons to the left of the bands: red circle, circular RNA; red line, nicked RNA; blue line, precursor RNA.
